# Supplementary material for: Phosgene invites selective switch-on fluorescence at ppm concentrations in a Betti base by hindering 2-way PET
Source: Royal Society of Chemistry journal article supplement (doi:10.1039/c9nj02541c), 2019-01-01
Supplement: c9nj02541c1.pdf [file c9nj02541c1.pdf]

## **Supporting Information**

to accompany

### **Phosgene invites selective switch-on fluorescence at ppm concentrations in a Betti base by hindering 2-way PET**

Ankita Gangopadhyay,<sup>†</sup> Ajit Kumar Mahapatra<sup>\*,†</sup>

<sup>†</sup> Department of Chemistry, Indian Institute of Engineering Science and Technology (formerly Bengal  
Engineering and Science University) Shibpur, Howrah, West Bengal 711103, India.

\*Corresponding author. Fax: +91 33 26684564; Tel: +91 33 2668 4561;

E-mail: mahapatra574@gmail.com (A. K. Mahapatra)

## Contents

| <b>Serial#</b> | <b>Description</b>                                                       | <b>Page</b> |
|----------------|--------------------------------------------------------------------------|-------------|
| <b>1</b>       | Calculation of Limit of Detection (LOD)                                  | <b>1</b>    |
| <b>2</b>       | Calculation of pseudo first order rate constant                          | <b>1</b>    |
| <b>3</b>       | Determination of fluorescence quantum yields                             | <b>2</b>    |
| <b>4</b>       | Fluorescence lifetime data                                               | <b>2-3</b>  |
| <b>5</b>       | Characterization of <b>BB</b> and <b>BBC</b>                             | <b>3-8</b>  |
| <b>6</b>       | Comparison table indicating recently reported important phosgene sensors | <b>9</b>    |

## 1. Calculation of Limit of Detection (LOD)

The calibration curve was derived from a plot of fluorescence intensity at 430 nm as a function of phosgene concentration. The regression equation was obtained for the part corresponding to lower phosgene concentrations (1.0 – 5.0  $\mu\text{M}$ ).

$$LOD = 3\sigma/k$$

where  $k$  is the slope of the curve and  $\sigma$  stands for the standard deviation of the fluorescence intensity of **BB** in presence of phosgene.

$$F_{430} = 1.92859E + 6x - 277260.46119 \quad (R^2 = 0.99208)$$

$$LOD = (3 \times 256568.86844) \div (1.92859E + 6) = 0.40 \mu\text{M}$$

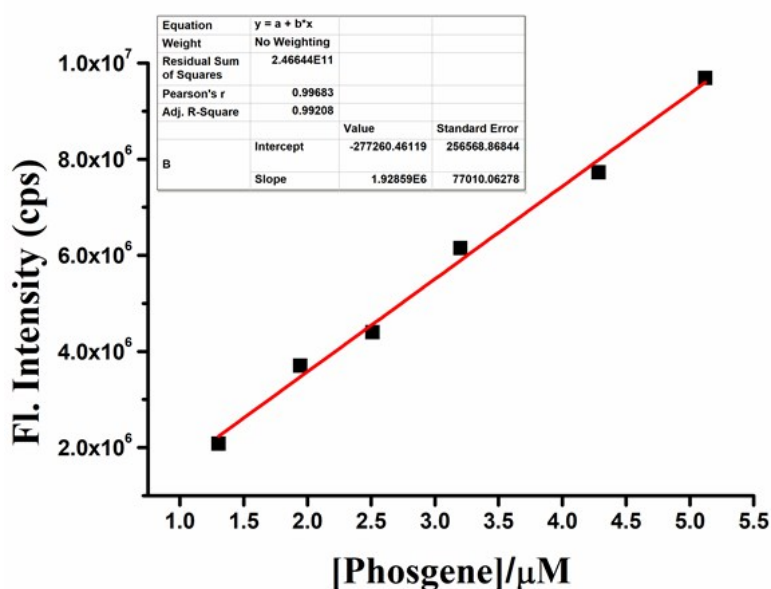

**Figure S1.** Calibration curve of fluorescence intensity (at 430 nm) of 10.0  $\mu\text{M}$  of **BB** as a function of phosgene concentration. ( $\lambda_{\text{ex}} = 350 \text{ nm}$ ,  $\lambda_{\text{em}} = 430 \text{ nm}$ ).

## 2. Calculation of pseudo first order rate constant: $k'$

Measurement of the fluorescence enhancement of **BB** (10.0  $\mu\text{M}$ ) at 430 nm in presence of an excess of triphosgene (150.0  $\mu\text{M}$ ) containing added TEA led to the determination of the pseudo first order rate constant from the following equation:

$$\ln\left[\frac{F_{\text{max}} - F_t}{F_{\text{max}}}\right] = -k' t$$

where  $F_t$  and  $F_{max}$  obtained upon constant which has

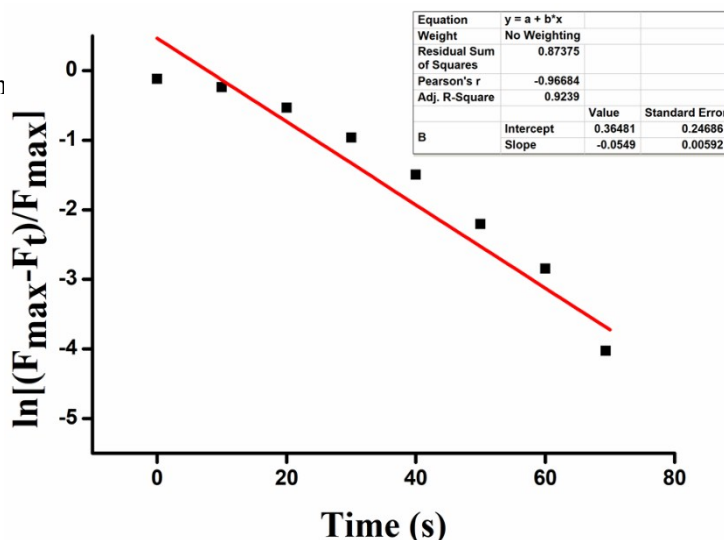

the maximum value pseudo-first order rate

**Figure S2.** Pseudo first order kinetic plot of **BB** (10.0  $\mu\text{M}$ ) in the presence of triphosgene/TEA (150  $\mu\text{M}$ ). ( $\lambda_{\text{ex}} = 350 \text{ nm}$ ).

### 3. Determination of fluorescence quantum yields

The fluorescence quantum yields of **BB** and **BBC** were determined in 0.05M  $\text{H}_2\text{SO}_4$  with quinine sulfate ( $\phi = 0.52$ ) as the fluorescence standard. The quantum yields were calculated using the following equation:

$$\phi_S = \phi_A \times \frac{F_S}{F_A} \times \frac{A_A}{A_S} \times \frac{\eta_S^2}{\eta_A^2}$$

where  $A_A$  and  $A_S$  are the absorbances of quinine sulfate and sample solutions at the same excitation wavelength;  $F_A$  and  $F_S$  are the corresponding integrated fluorescence intensities of quinine sulfate and sample solutions;  $\eta_A$  and  $\eta_S$  are the refractive indices of the respective solvents employed which in this case is 0.05M  $\text{H}_2\text{SO}_4$  for both measurements.

### 4. Fluorescence Lifetime Data

Radiative ( $k_r$ ) and non-radiative ( $k_{nr}$ ) rate constants of **BB** and **BBC** were evaluated using the following equations:

$$\tau^{-1} = k_r + k_{nr}$$

$$k_r = \phi / \tau$$

where  $\tau$ ,  $k_r$ ,  $k_{nr}$  and  $\phi$  are the mean fluorescence lifetime, radiative rate constant, non-radiative rate constant and fluorescence quantum yield, respectively. All photo-physical parameters are given below.

| Species    | $\phi$ | $\tau$ | $k_r(ns^{-1})$ | $k_{nr}(ns^{-1})$ |
|------------|--------|--------|----------------|-------------------|
| <b>BB</b>  | 0.049  | 0.917  | 0.053          | 1.037             |
| <b>BBC</b> | 0.706  | 1.025  | 0.688          | 0.286             |

**Table S1: Fluorescence life time data**

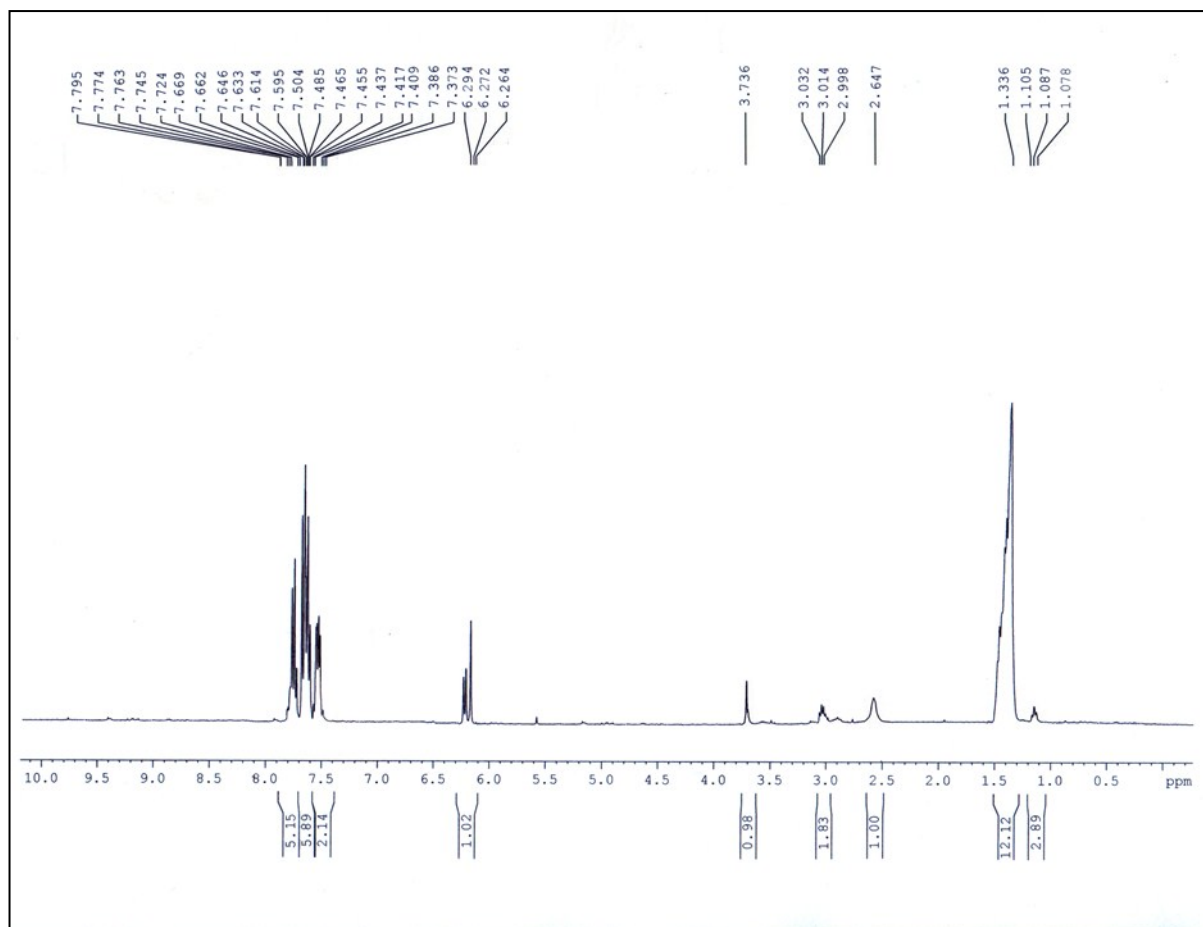

**Figure S3:  $^1\text{H}$  NMR of **BB** in  $\text{CDCl}_3$**

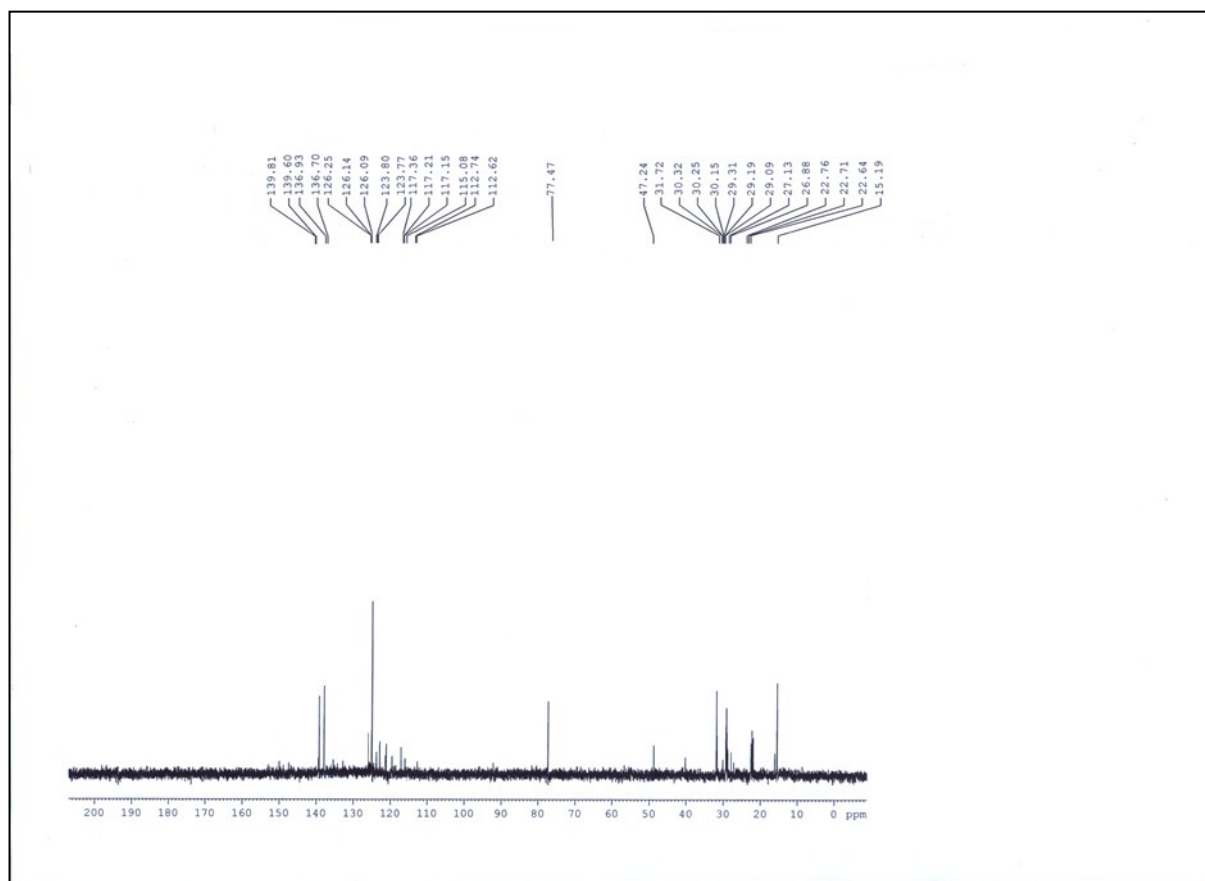

**Figure S4:**  $^{13}\text{C}$  NMR of BBin in  $\text{CDCl}_3$

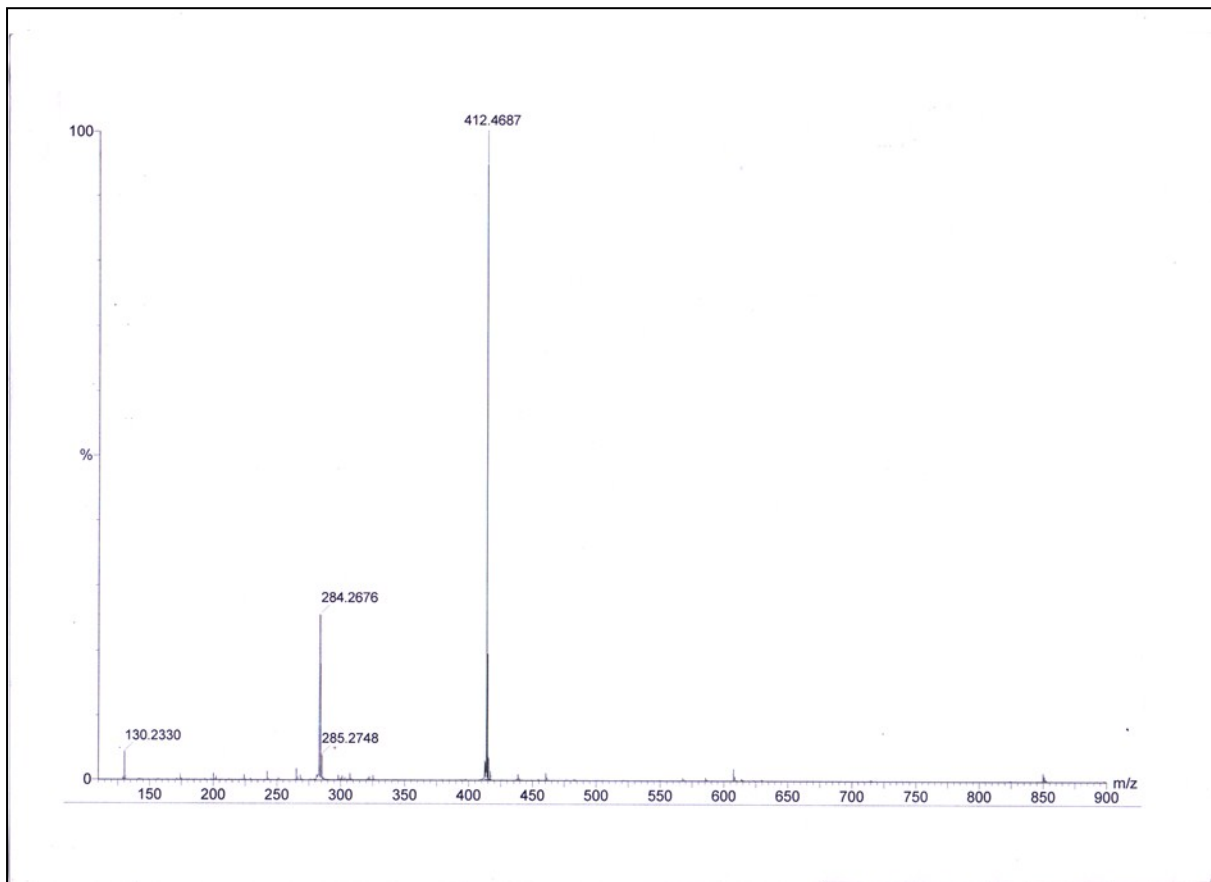

**Figure S5: ESI-MS of BB**

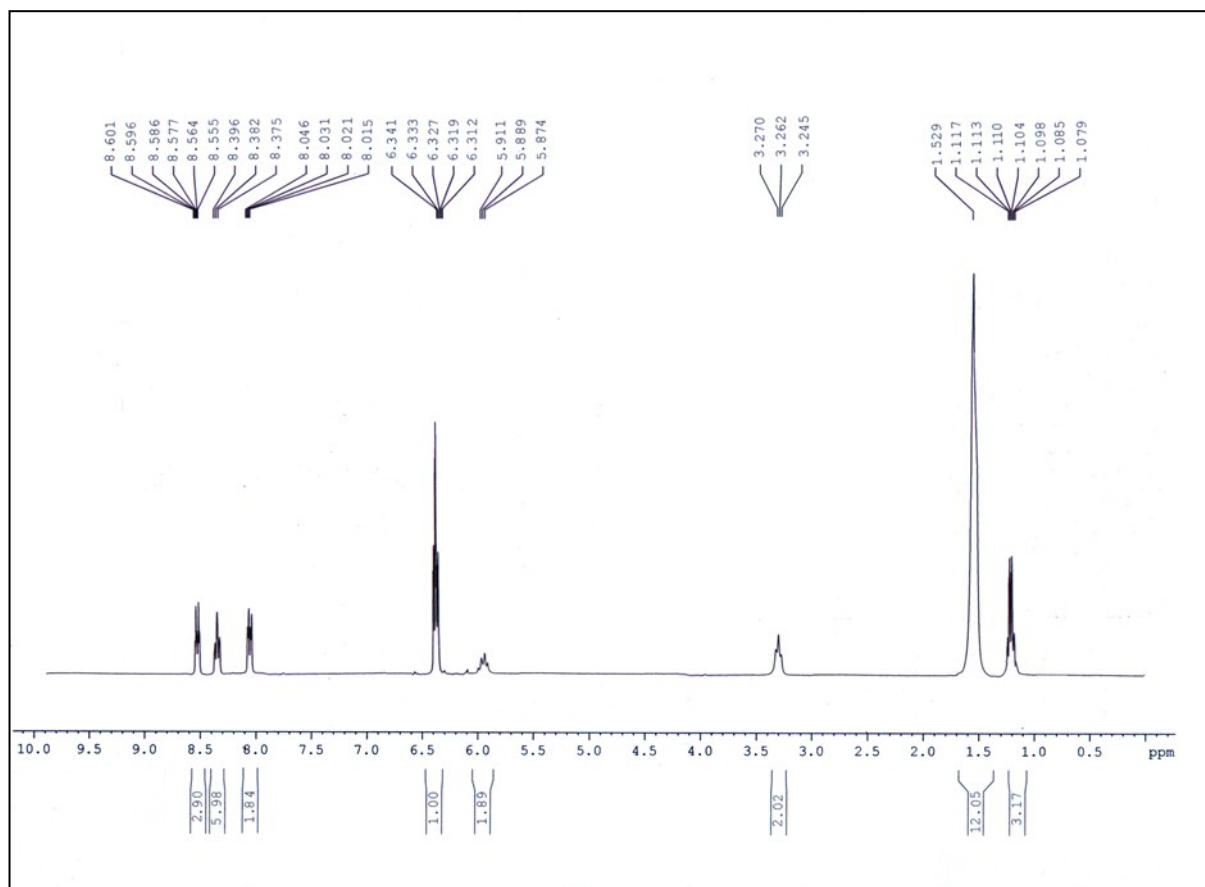

**Figure S6:**  $^1\text{H}$  NMR of BBCin in  $\text{CDCl}_3$

$^1\text{H}$  NMR (400 MHz,  $\text{CDCl}_3$ ),  $\delta$  (TMS, ppm): 1.10 (m, 3H), 1.52 (s, 12H), 3.25 (t,  $J=10.0\text{Hz}$ , 2H), 5.89 (t,  $J = 14.8\text{Hz}$ , 2H), 6.32 (m, 1H), 8.02 (q,  $J=12.4\text{ Hz}$ , 2H), 8.38 (t,  $J=8.4\text{ Hz}$ , 6H), 8.56 (m, 3H).



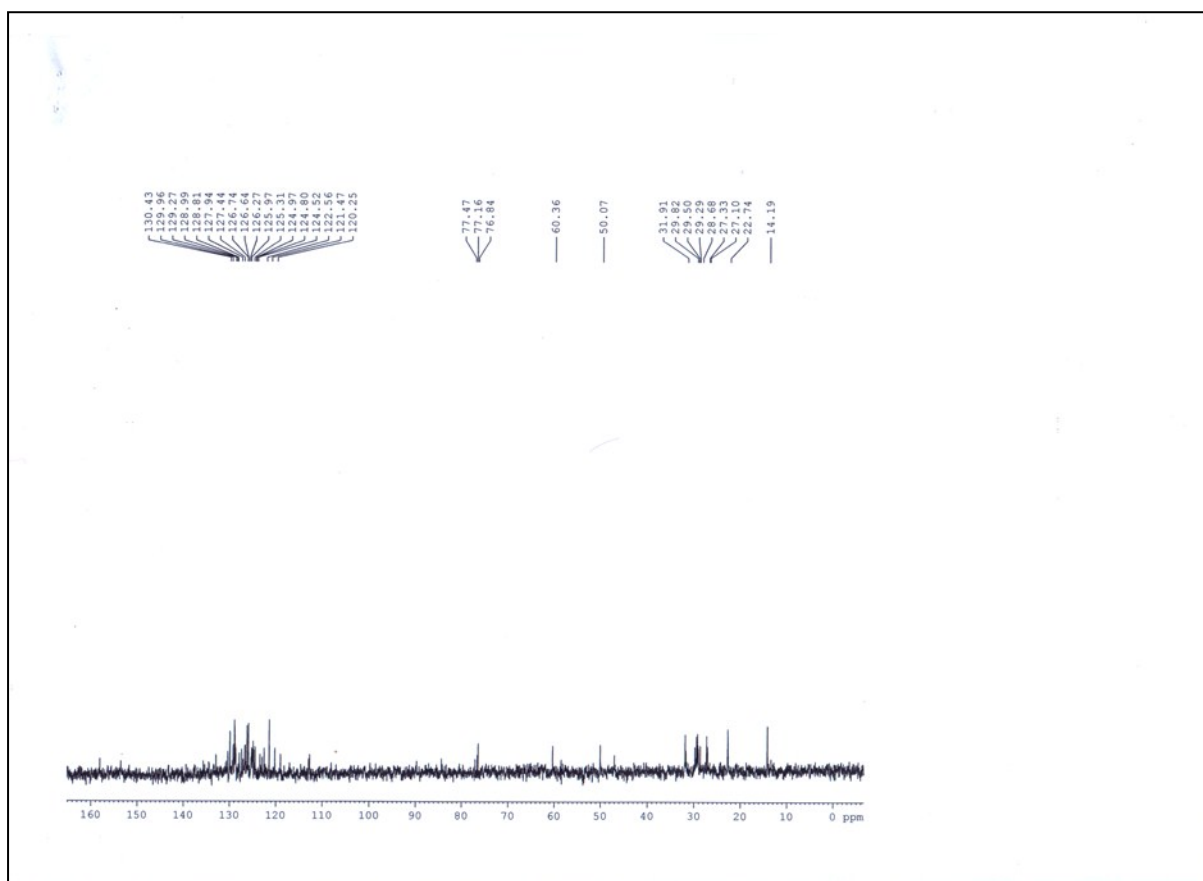

**Figure S7:**  $^{13}\text{C}$  NMR of **BBC** in  $\text{CDCl}_3$

$^{13}\text{C}$  NMR (400 MHz,  $\text{CDCl}_3$ )  $\delta$  (TMS, ppm): 14.19 (1C), 22.74 (1C), 27.21 (1C), 28.68 (1C), 29.53 (3C), 31.91 (1C), 50.07 (1C), 60.36 (1C), 77.15 (2C), 120.25 (1C), 121.47 (3C), 122.56 (2C), 124.90 (3C), 126.40 (2C), 127.44 (2C), 127.94 (2C), 128.90 (2C), 130.19 (1C).

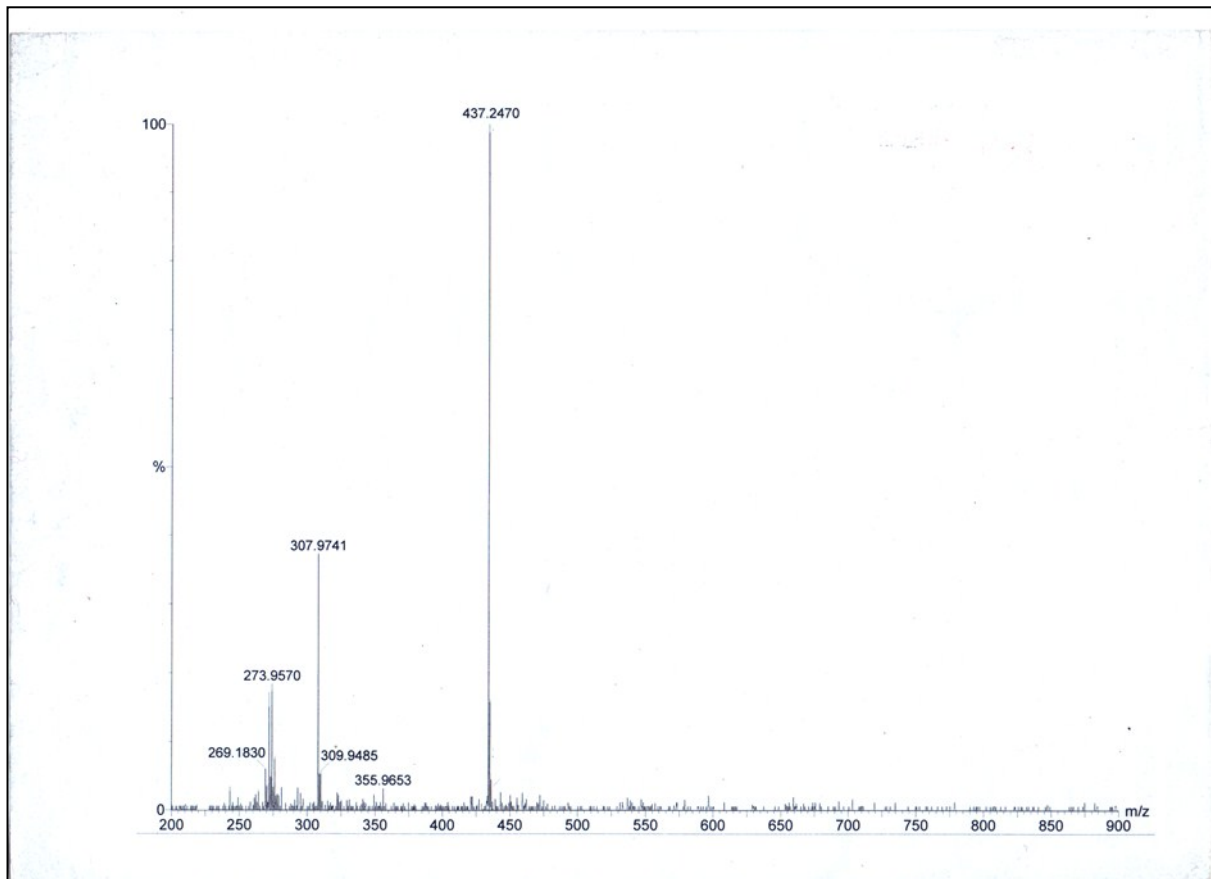

**Figure S8:** ESI-MS of **BBC**

(ESI (+)-HRMS (m/z):  $[M]^+$  calculated for  $C_{30}H_{31}NO_2$ : 437.2355, found: 437.2470)

| Compound                                                                            | Response Time | Detection Limit | Application                              | Reference                                                        |
|-------------------------------------------------------------------------------------|---------------|-----------------|------------------------------------------|------------------------------------------------------------------|
| 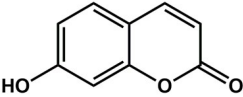   | -----         | 1 nM            | Not reported                             | Hwang et al. <i>Anal. Chem.</i> <b>2012</b> , 84, 10, 4594-4597  |
|    | < 10s         | 0.09 ppb        | TLC stick based test kit                 | Kim et al. <i>Anal. Chem.</i> <b>2017</b> , 89, 23, 12837-12842  |
|   | < 5 min       | 2.3 nM          | Polystyrene membrane-based test strips   | Sheng et al. <i>Anal. Chem.</i> <b>2018</b> , 90, 14, 8686-8691  |
|  | -----         | 0.48 nM         | Probe embedded TLC sticks as test strips | Feng et al. <i>Dyes and Pigments.</i> <b>2019</b> , 163, 483-488 |
|  | -----         | 0.14 ppm        | Filter paper-based test strips           | Yoon et al. <i>Anal. Chem.</i> <b>2017</b> , 89, 22, 12596-12601 |
|  | ~15 s         | 2.7 nM          | TLC plate-based test kit                 | Song et al. <i>Anal. Chem.</i> <b>2017</b> , 89, 7, 4192-4197    |
|  | < 20 s        | 0.40 μM         | TLC plate-based test strip               | This work.                                                       |

**Table S2: Comparison table indicating several notable phosgene sensors and this work**
